# Supplementary material for: One-pot synthesis of uniform Cu2O–CuO–TiO2 hollow nanocages with highly stable lithium storage properties
Source: Royal Society of Chemistry journal article supplement (doi:10.1039/c7ta03565a), 2017-01-01
Supplement: c7ta03565a1.pdf [file c7ta03565a1.pdf]

## Supporting Information

### One-Pot Synthesis of Uniform Cu<sub>2</sub>O-CuO-TiO<sub>2</sub> Hollow Nanocages and Highly Stable Lithium Storage Properties

Guangxia Wang,<sup>a</sup> Yongming Sui,<sup>\*a</sup> Meina Zhang,<sup>b</sup> Man Xu,<sup>a</sup> Qingxin Zeng,<sup>a</sup> Chuang Liu,<sup>a</sup> Xinmei Liu,<sup>a</sup> Fei Du,<sup>\*ab</sup> and  
Bo Zou<sup>\*a</sup>

<sup>a</sup>State Key Laboratory of Superhard Materials, Jilin University, Changchun 130012, P. R. China

<sup>b</sup>Laboratory of Physics and Technology for Advanced Batteries (Ministry of Education), College of Physics, Jilin  
University, Changchun 130012, P. R. China

\*Corresponding Author: zoubo@jlu.edu.cn; suiym@jlu.edu.cn; dufei@jlu.edu.cn;

## Experiment section

### Reagents

Copper sulfate pentahydrate ( $\text{CuSO}_4 \cdot 5\text{H}_2\text{O}$ ), glucose ( $\text{C}_6\text{H}_{12}\text{O}_6$ ), potassium sodium tartrate tetrahydrate and potassium hydroxide (KOH) purchased from Guoyao Chemical Reagent Company (Shanghai, China). Titanium fluoride (99%) was commercially available. All chemicals were used in the experiments without further purification. Deionized water was used throughout the experiments.

**Preparation of pure  $\text{Cu}_2\text{O}$  Solid Truncated Octahedron (26-facet  $\text{Cu}_2\text{O}$ ):** solid truncated octahedral  $\text{Cu}_2\text{O}$  was synthesized by reduction a basic tartrate complex solution (Fehling's solution) with glucose.<sup>1</sup> Fehling's solution composed of  $7 \text{ g L}^{-1}$  of  $\text{CuSO}_4 \cdot 5\text{H}_2\text{O}$ ,  $25 \text{ g L}^{-1}$  of potassium sodium tartrate tetrahydrate and  $4.5 \text{ g L}^{-1}$  of KOH.  $0.4 \text{ mL}$  ( $0.25\text{M}$ ) glucose aqueous solution was added into  $20 \text{ mL}$  of the diluted stock Fehling's solution with water (volume ratio of Fehling solution and water was 1:9) during stirring. Then, the mixed solution was transferred into a static water bath and kept at  $75^\circ\text{C}$  for 1 h. The resulting precipitates were centrifuged at  $6000 \text{ rpm min}^{-1}$  for 3 min, washed with water for twice, and finally dried at  $60^\circ\text{C}$  for 6 h for further use.

**Pure anatase  $\text{TiO}_2$  crystals** were fabricated by the same process without the addition of  $\text{Cu}_2\text{O}$  nanoparticles.<sup>2,3</sup>

### Materials characterization

The composition of these products were investigated by Powder X-ray diffraction (XRD) using a rotating a MicroMax-007HF equipped with a rotating anode Cu-K $\alpha$  target with multilayer optics and an imaging plate detector. The X-ray generator worked at 40KV and 30mA, and the X-ray beam size was reduced to  $30\mu\text{m}$  using a pin-hole collimator.

The X-ray photoelectron spectroscopy (XPS) was collected on the VG ESCALAB MKII spectrometer with an Mg K $\alpha$  excitation ( $1253.6 \text{ eV}$ ). The morphology and element mapping images of the as-obtained samples was carried out by a Field emission scanning electron microscope (FESEM, FEI Company) operating at 18kV. STEM, STEM-element mapping, HRTEM, and SAED patterns were obtained on a JEM 2200FS with an accelerating voltage of 200 kV.

## Electrochemical characterization

The electrochemical experiments of  $\text{Cu}_2\text{O-CuO-TiO}_2$  electrodes were carried out by assembling coin-type half cells. The working electrode was composed of  $\text{Cu}_2\text{O-CuO-TiO}_2$  active material (70 wt %), Ketjen Black (carbon ECP) conductive additive (20 wt %), carboxyl methylcellulose (CMC, 5 wt %) and styrene butadiene rubber (SBR, 5 wt %) dissolved in deionized water on a copper foil. The slurry mixture dried in vacuum at 100 °C for 12 h. After punched into round disks with a diameter of 10 mm, the test electrodes with a mass loading about 1.0-2.0 mg were assembled using metallic lithium as counter electrode and Celgard 2320 membranes as separators inside an Ar-filled glove box. The electrolyte was 1 M lithium hexafluorophosphate ( $\text{LiPF}_6$ ) dissolved in a mixture of ethylene carbonate (EC) and diethyl carbonate (DEC) with a volume ratio of 1:1. The galvanostatic charge–discharge cycling was conducted on a Land-2001A (Wuhan, China) automatic battery tester. Cyclic voltammetry (CV) and electrochemical impedance spectra (EIS) were performed on a VSP multichannel potentiostatic–galvanostatic system (Biologic, France). CV curves were recorded at a scanning rate of  $0.1 \text{ mV s}^{-1}$  from 0.01 V to 3.0 V. The EIS data was recorded from 1 MHz to 5 MHz by applying an AC voltage of 5 mV.

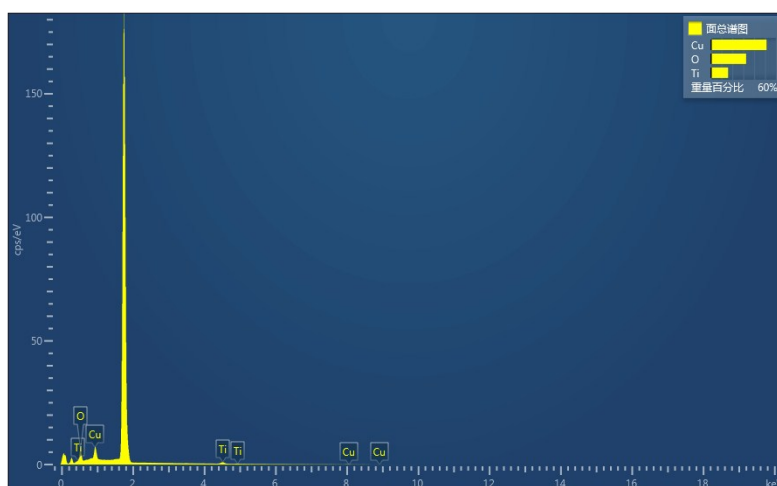

**Fig. S1** Energy dispersive X-ray (EDX) spectra of  $\text{Cu}_2\text{O-CuO-TiO}_2$ .

**Table S1.** The composition mass ratio of Cu<sub>2</sub>O-CuO-TiO<sub>2</sub> hollow nanocage in different areas. The average mass ratio of Cu and Ti is 3.4:1

| Elemental/Test | 1st   | 2nd   | 3rd   | 4th   | Average |
|----------------|-------|-------|-------|-------|---------|
| Cu             | 53.83 | 55.56 | 55.25 | 54.52 | 54.79   |
| Ti             | 16.04 | 14.92 | 16.76 | 16.85 | 16.14   |

### Calculation for theoretical capacities

According to the EDS analysis of composition, the element mass fraction of copper and Ti can be roughly determined as 77.2% and 22.8%, respectively. Besides, based on the XRD characterization, the relative contents of the Cu<sub>2</sub>O phase and CuO phase in copper oxides are calculated by the height of characteristic diffraction peaks. According to  $I_{Cu_2O(111)}/(I_{CuO(111)} + I_{Cu_2O(111)})$ , the mass ratio of Cu<sub>2</sub>O is about 79% in the copper oxides composites. It is noted that the mass ratio of the Cu<sub>2</sub>O is estimated by the XRD of samples fabricated in 170 °C 1 h. Calculated the mass ratio between each material based on the above data, the theoretical capacity of the CCT is as follows:

$$C_{theoretical} = C_{Cu_2O} \times wt\%_{Cu_2O} + C_{CuO} \times wt\%_{CuO} + C_{TiO_2} \times wt\%_{TiO_2}$$

$$C_{CCT} = 375 \times 77.2\% \times 79\% + 674 \times 77.2\% \times 21\% + 176 \times 22.8\% = 378 \text{ mAh g}^{-1}$$

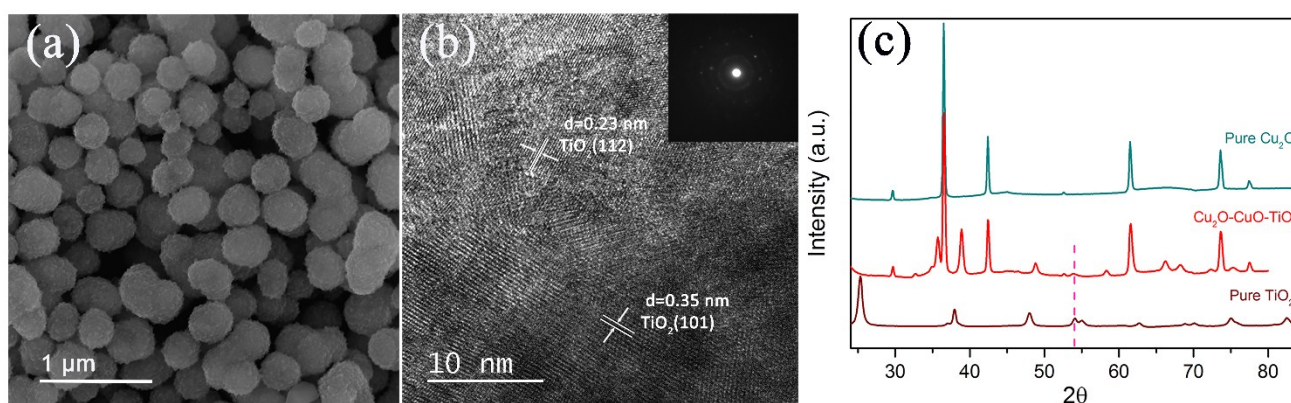

**Fig. S2** (a) FESEM image and (b) HRTEM of pure TiO<sub>2</sub> and (c) XRD images of pure Cu<sub>2</sub>O, Cu<sub>2</sub>O-CuO-TiO<sub>2</sub> and pure TiO<sub>2</sub>.

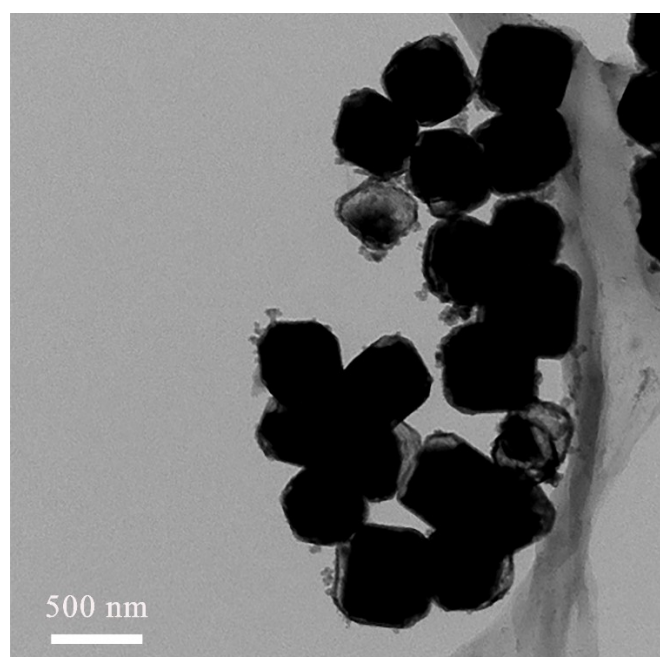

**Fig. S3** STEM image of  $\text{Cu}_2\text{O-CuO-TiO}_2$  synthesized in  $170\text{ }^\circ\text{C}$  for 5 min.

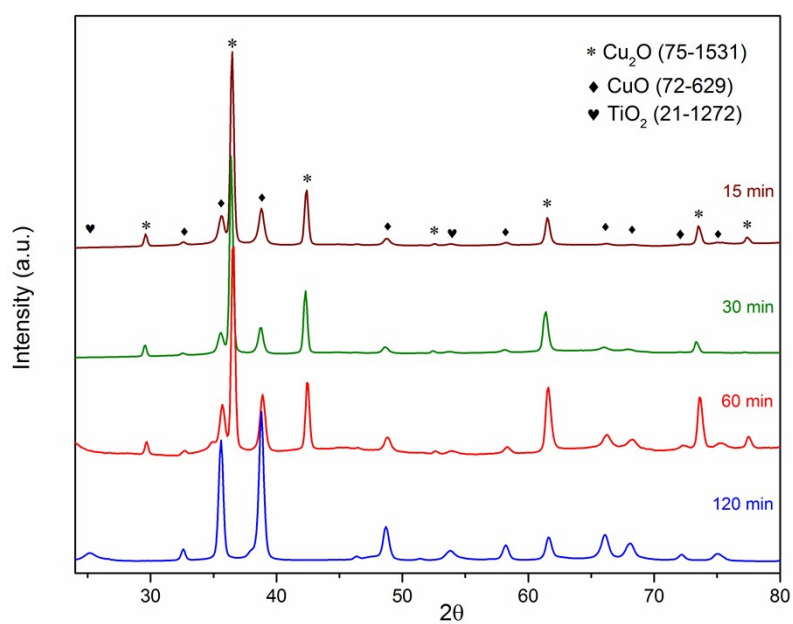

**Fig. S4** XRD image of  $\text{Cu}_2\text{O-CuO-TiO}_2$  synthesized in  $170\text{ }^\circ\text{C}$  for different time.

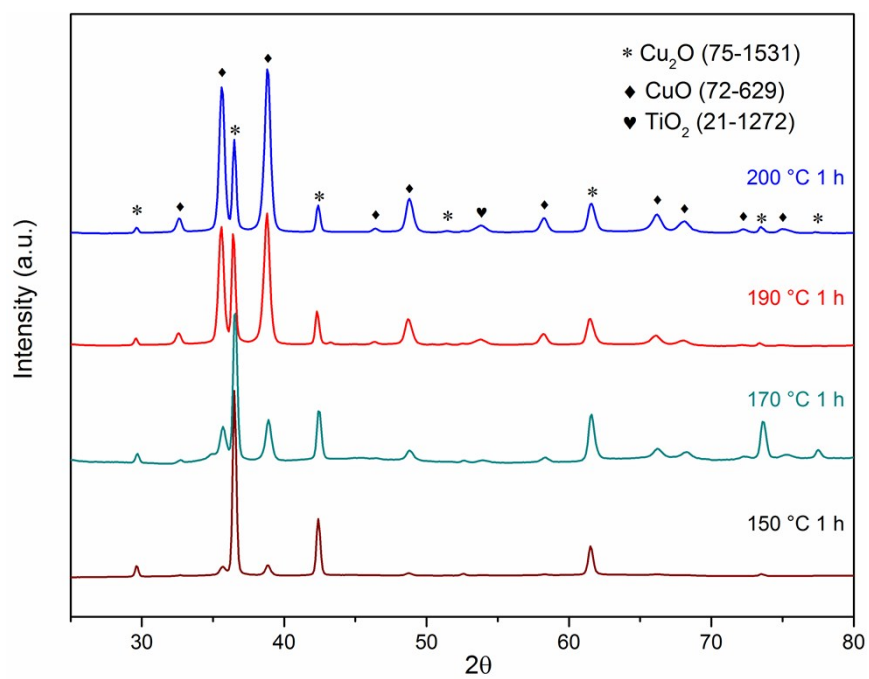

**Fig. S5** XRD image of  $\text{Cu}_2\text{O}$ - $\text{CuO}$ - $\text{TiO}_2$  synthesized in different temperature for 1 h.

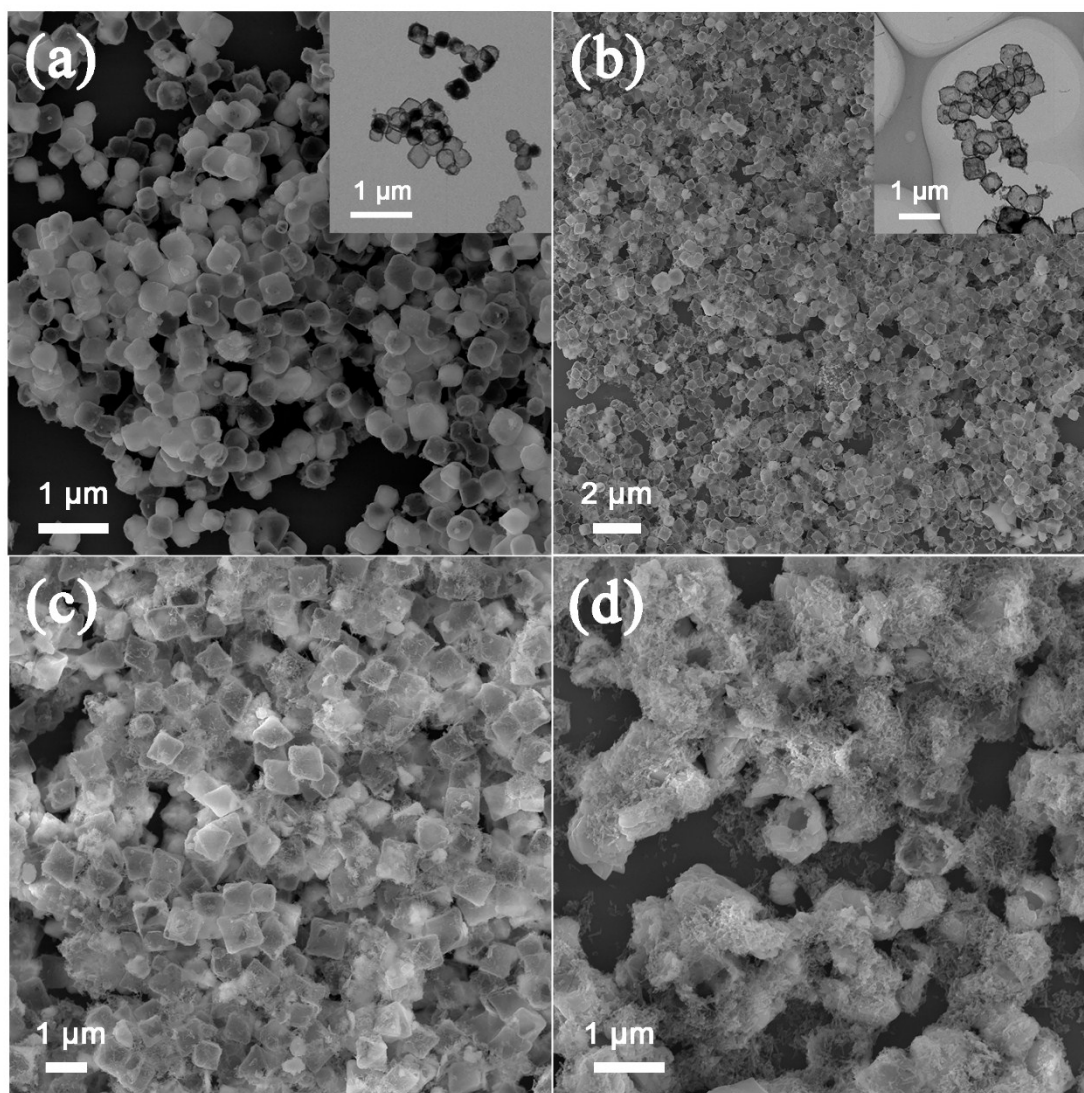

**Fig. S6** FESEM images of  $\text{Cu}_2\text{O-CuO-TiO}_2$  synthesized at (a) 160  $^\circ\text{C}$  and (b) 180  $^\circ\text{C}$ , (c) 190  $^\circ\text{C}$ , (d) 200  $^\circ\text{C}$  for 1 h.

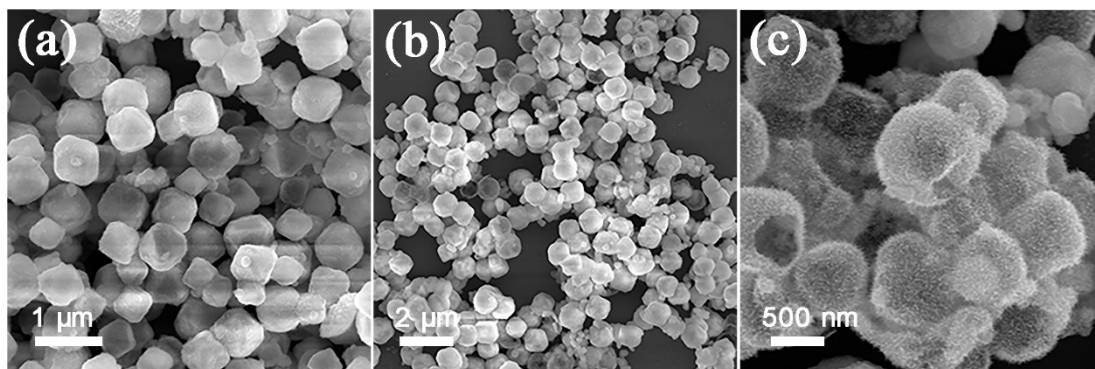

**Fig. S7** FESEM images of  $\text{Cu}_2\text{O-CuO-TiO}_2$  synthesized with different initial concentration of  $\text{TiF}_4$  about (a) 0.64 mM, (b) 0.8 mM and (c) high magnification of 0.8 mM.

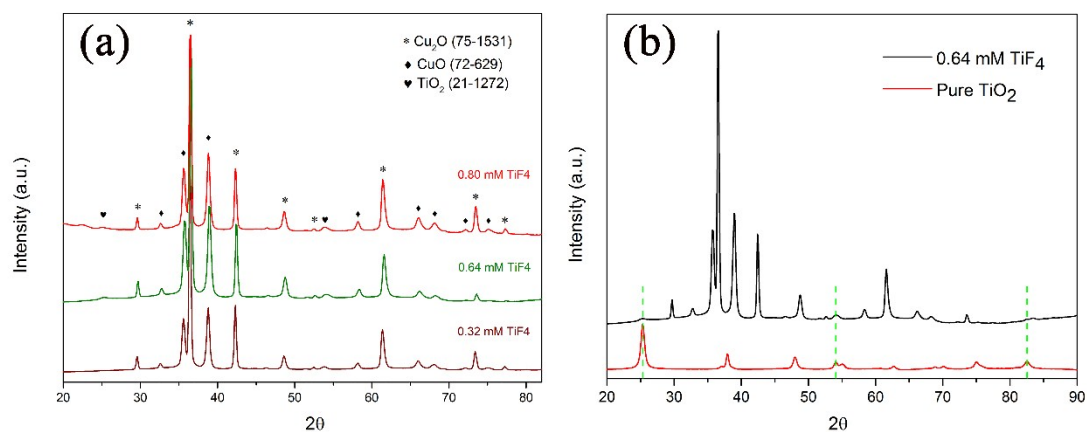

**Fig. S8** XRD images of (a)  $\text{Cu}_2\text{O-CuO-TiO}_2$  synthesized with different initial concentration of  $\text{TiF}_4$ , (b) contrast of  $\text{Cu}_2\text{O-CuO-TiO}_2$  (initial concentration of  $\text{TiF}_4$  is 0.64 mM) and pure  $\text{TiO}_2$ .

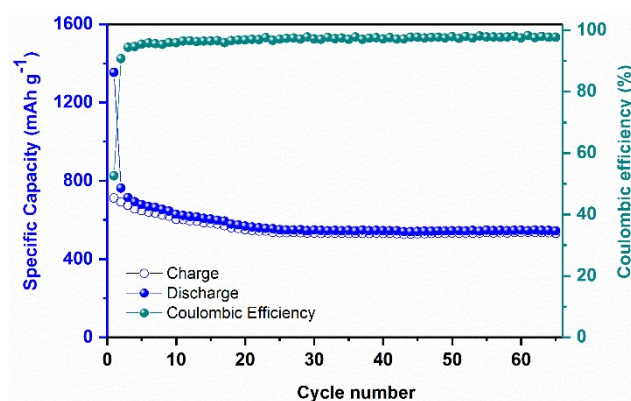

**Fig. S9** The electrochemical test of  $\text{Cu}_2\text{O-CuO-TiO}_2$  at a current density of  $100 \text{ mA g}^{-1}$

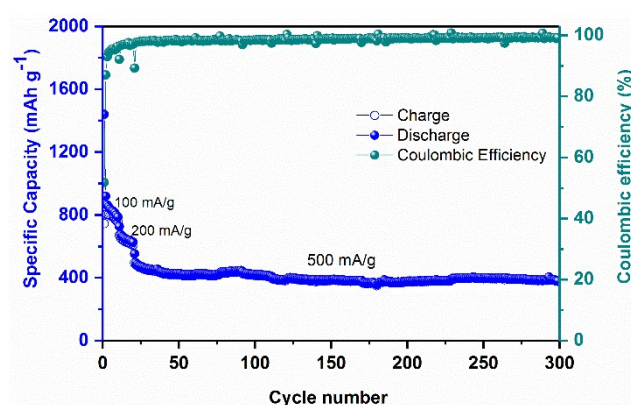

**Fig. S10** Long cycling performance of  $\text{Cu}_2\text{O-CuO-TiO}_2$  at  $500 \text{ mA g}^{-1}$ .

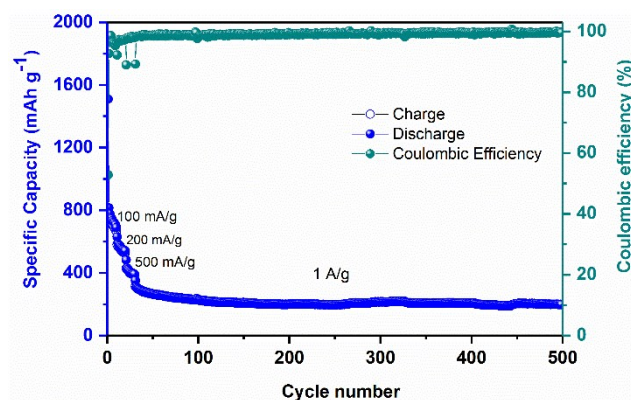

**Fig. S11** Long cycling performance of  $\text{Cu}_2\text{O-CuO-TiO}_2$  at  $1 \text{ A g}^{-1}$ .

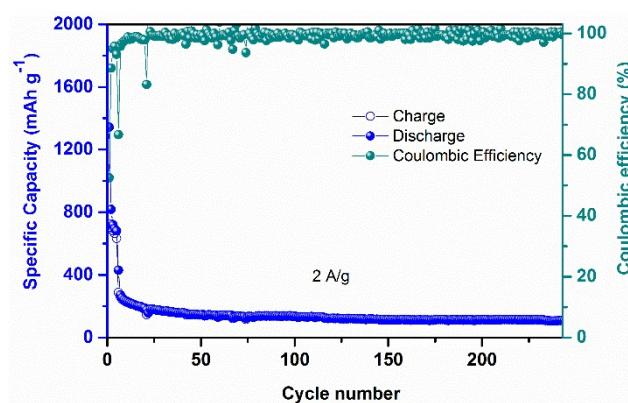

**Fig. S12** Cycling performance of  $\text{Cu}_2\text{O-CuO-TiO}_2$  at  $2 \text{ A g}^{-1}$  after activation for 5 cycles at  $100 \text{ mA/g}$ .

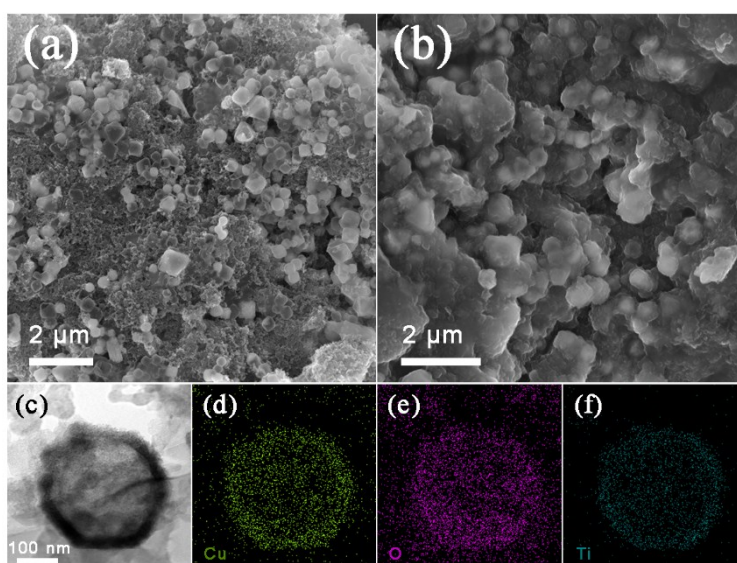

**Fig. S13** FESEM images of the electrode (a) before and (b) after 100 cycles. (c-f) STEM-element mapping results of Cu, O, Ti from a single hybrid nanocage after 100 cycles.

**Table S2.** Electrochemical properties of hollow nanocage structured Cu<sub>2</sub>O-CuO-TiO<sub>2</sub> in this work, previous reports of different structures or composite materials with Cu<sub>2</sub>O, hollow CuO octahedra and hollow TiO<sub>2</sub> nanocages.

| Morphology                                                    | Electrochemical properties( discharge capacity)                                                                                                                                                     | Current density or rate                         | Preparation method                                  | Reference |
|---------------------------------------------------------------|-----------------------------------------------------------------------------------------------------------------------------------------------------------------------------------------------------|-------------------------------------------------|-----------------------------------------------------|-----------|
| Cu <sub>2</sub> O-CuO-TiO <sub>2</sub> hollow nanocages       | 700 mAh·g <sup>-1</sup> /85 <sup>th</sup> cycle<br>546 mAh·g <sup>-1</sup> /65 <sup>th</sup> cycle                                                                                                  | 50 mA g <sup>-1</sup><br>100 mA g <sup>-1</sup> | hydrothermal method                                 | This work |
| 26-faceted Cu <sub>2</sub> O                                  | 145 mAh g <sup>-1</sup> /50 <sup>th</sup> cycle                                                                                                                                                     | 80 mA g <sup>-1</sup>                           | solution-phase route                                | 4         |
| Cu <sub>2</sub> O with different crystal planes               | 397 mAh g <sup>-1</sup> /50 <sup>th</sup> cycle (cubes)<br>245.8 mAh g <sup>-1</sup> /50 <sup>th</sup> cycle (octahedra)<br>201.5 mAh g <sup>-1</sup> /50 <sup>th</sup> cycle (truncated octahedra) | 100 mA g <sup>-1</sup>                          | solution-phase route                                | 5         |
| Cu <sub>2</sub> O nanocube                                    | 420 mAh·g <sup>-1</sup> /50 <sup>th</sup> cycle<br>236 mAh·g <sup>-1</sup> /50 <sup>th</sup> cycle                                                                                                  | 0.2 C<br>1 C                                    | solution-phase route                                | 6         |
| Cu <sub>2</sub> O hollow structure                            | 43 mAh·g <sup>-1</sup> /50 <sup>th</sup> cycle (hollow octahedra)<br>75.3 mAh·g <sup>-1</sup> /50 <sup>th</sup> cycle (core@shell)                                                                  | 100 mA g <sup>-1</sup>                          | solution-phase route                                | 7         |
| Porous Cu <sub>2</sub> O film                                 | 336 mAh g <sup>-1</sup> /50 <sup>th</sup> cycle<br>213 mAh g <sup>-1</sup> /50 <sup>th</sup> cycle                                                                                                  | 0.1 C<br>5 C                                    | electrodeposition                                   | 8         |
| Cu <sub>2</sub> O over hydrogen exfoliated graphene           | 430 mAh g <sup>-1</sup> /25 <sup>th</sup> cycle                                                                                                                                                     | 0.1 C                                           | deposition & heating in Ar+H <sub>2</sub> gas       | 9         |
| Cu <sub>2</sub> O/Ti <sub>2</sub> CT <sub>x</sub> (T = O, OH) | 145 mAh g <sup>-1</sup> /200 <sup>th</sup> cycle                                                                                                                                                    | 1000 mA g <sup>-1</sup>                         | solvothermal method & ultrasonic treatment          | 10        |
| Cu/Cu <sub>2</sub> O/CuO heterostructures                     | 345 mAh·g <sup>-1</sup> /50 <sup>th</sup> cycle                                                                                                                                                     | 100 mA·g <sup>-1</sup>                          | hydrothermal method & oxidation process.            | 11        |
| CuO/Cu <sub>2</sub> O hollow sphere                           | 520 mAh·g <sup>-1</sup> /20 <sup>th</sup> cycle                                                                                                                                                     | 67 mA g <sup>-1</sup>                           | Hydrothermal method                                 | 12        |
| CuO/Cu/TiO <sub>2</sub> NT/Ti                                 | 226 mAh·g <sup>-1</sup> /50 <sup>th</sup> cycle<br>365 mAh·g <sup>-1</sup> /50 <sup>th</sup> cycle<br>(different electrodeposition time)                                                            | —                                               | Anodization & electrodeposition & thermal oxidation | 13        |
| CuO                                                           | 429 mAh g <sup>-1</sup> /50 <sup>th</sup> cycle (microsphere)<br>392.4 mAh g <sup>-1</sup> /50 <sup>th</sup> cycle (flower-like)<br>193.0 mAh g <sup>-1</sup> /50 <sup>th</sup> cycle (thorn-like)  | 0.1 C                                           | solution-phase route<br>hydrothermal method         | 14        |
| CuO nanofibers                                                | 426 mAh·g <sup>-1</sup> /100 <sup>th</sup> cycle                                                                                                                                                    | 100 mA g <sup>-1</sup>                          | electrospun                                         | 15        |

|                           |                                                  |                        |                                                             |    |
|---------------------------|--------------------------------------------------|------------------------|-------------------------------------------------------------|----|
| Porous CuO                | 320 mAh g <sup>-1</sup> /50 <sup>th</sup> cycle  | 0.1 C                  | hydrothermal &<br>thermal decomposition                     | 16 |
| CuO hollow<br>octahedra   | 470 mAh g <sup>-1</sup> /100 <sup>th</sup> cycle | 100 mA g <sup>-1</sup> | metal<br>organic frameworks                                 | 17 |
| CuO/C<br>microspheres     | 470 mAh g <sup>-1</sup> /50 <sup>th</sup> cycle  | 100 mA g <sup>-1</sup> | calcining<br>in Ar gas followed by a<br>oxidation treatment | 18 |
| TiO <sub>2</sub> nanocage | 140 mAh·g <sup>-1</sup> /200 <sup>th</sup> cycle | 0.5 C                  | hydrothermal method                                         | 2  |

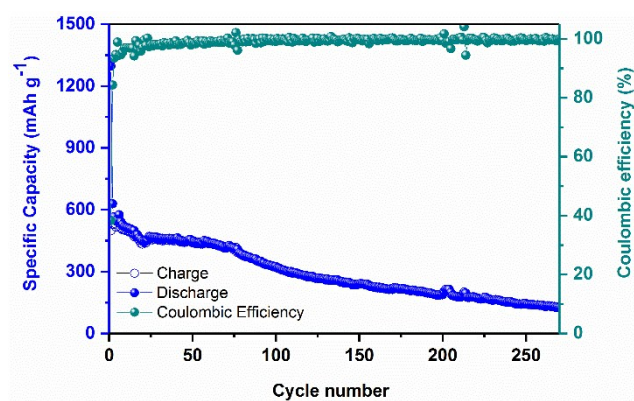

**Fig. S14** Cycling performance of pure solid  $\text{Cu}_2\text{O}$  at a current density of  $100 \text{ mA g}^{-1}$ .

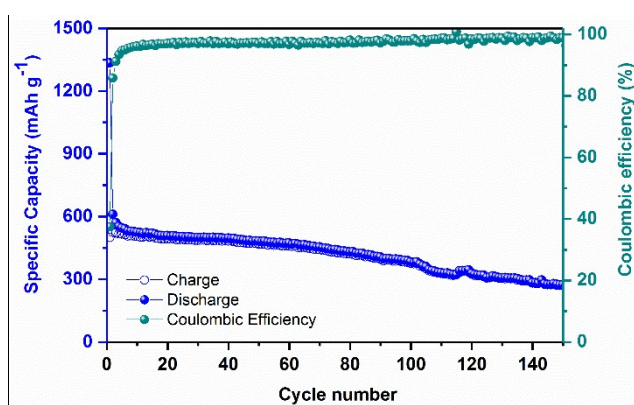

**Fig. S15** Cycling performance of the nanocaged  $\text{CuO}$  at a current density of  $100 \text{ mA g}^{-1}$ .

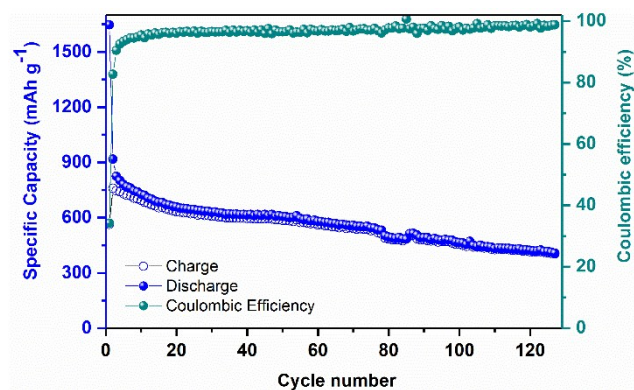

**Fig. S16** Cycling performance of the rod-like solid  $\text{CuO-TiO}_2$  at a current density of  $100 \text{ mA g}^{-1}$ .

1. C. Lu, *Adv. Mater.*, 2005, **17**(21), 2562.
2. Z. Wang and X. W. Lou, *Adv. Mater.*, 2012, **24**(30), 4124.
3. L. Liu, W. Yang, W. Sun, Q. Li and J. K. Shang, *ACS Appl. Mater. Interfaces*, 2015, **7**(3), 1465.
4. W. Kang, F. Liu, Y. Su, D. Wang and Q. Shen, *CrystEngComm*, 2011, **13**(12), 4174.
5. K. Chen, S. Song and D. Xue, *CrystEngComm*, 2015, **17**(10), 2110.
6. I. C. Chang, P.-C. Chen, M.-C. Tsai, T.-T. Chen, M.-H. Yang, H.-T. Chiu and C.-Y. Lee, *CrystEngComm*, 2013, **15**(13), 2363.
7. K. Chen, S. Song and D. Xue, *CrystEngComm*, 2013, **15**(46), 10028.
8. J. Y. Xiang, X. L. Wang, X. H. Xia, L. Zhang, Y. Zhou, S. J. Shi and J. P. Tu, *Electrochim. Acta*, 2010, **55**(17), 4921.
9. G. Ananya, N. Pranati and S. Ramaprabhu, *Int. J. Hydrogen Energy*, 2016, **41**(6), 3974.
10. H. Zhang, H. Dong, X. Zhang, Y. Xu and J. Fransaer, *Electrochim. Acta*, 2016, **202**, 24.
11. Y. Zhao, Y. Zhang, H. Zhao, X. Li, Y. Li, L. Wen, Z. Yan and Z. Huo, *Nano Res.*, 2015, **8**(8), 2763.
12. X. Guan, L. Li, G. Li, Z. Fu, J. Zheng and T. Yan, *J. Alloys Compd.*, 2011, **509**(7), 3367.
13. R. Meng, H. Hou, X. Liu, C. Yan, J. Duan and S. Liu, *Ceram. Int.*, 2016, **42**(5), 6039.
14. C. Wang, D. Higgins, F. Wang, D. Li, R. Liu, G. Xia, N. Li, Q. Li, H. Xu and G. Wu, *Nano energy*, 2014, **9**, 334.
15. R. Sahay, P. Suresh Kumar, V. Aravindan, J. Sundaramurthy, W. Chui Ling, S. G. Mhaisalkar, S. Ramakrishna and S. Madhavi, *J. Phys. Chem. C*, 2012, **116**(34), 18087.
16. M. Wan, D. Jin, R. Feng, L. Si, M. Gao and L. Yue, *Inorg. Chem. Commun.*, 2011, **14**(1), 38.
17. R. Wu, X. Qian, F. Yu, H. Liu, K. Zhou, J. Wei and Y. Huang, *J. Mater. Chem. A*, 2013, **1**(37), 11126.
18. X. H. Huang, C. B. Wang, S. Y. Zhang and F. Zhou, *Electrochim. Acta*, 2011, **56**(19), 6752.
